# Supplementary material for: Deficiency of inhibitory TLR4 homolog RP105 exacerbates fibrosis
Source: JCI journal article supplement (doi:10.1172/jci.insight.160684), 2022-09-22

**Supplementary Fig. 1: RP105 negatively correlates with ASMA in SSc and healthy control skin biopsies.** **A.** Skin biopsies from SSc (n=7) and healthy controls (n=4) were immunolabeled using antibodies to RP105 (green) and ASMA (red). Representative immunofluorescence images. Dotted line showed the epidermis and dermis intersection. Scale bars: 100  $\mu\text{m}$ , 20  $\mu\text{m}$ , and 5  $\mu\text{m}$ . **B.** Quantitative data represent the mean fluorescent intensity of both RP105 and ASMA measured in same cell from three different fields containing at least 3-4 cells/hpf from the indicated number of subjects. Pearson's rank correlation.

**Supplementary Fig. 2: RP105 KO mice showed increased accumulation of leukocytes and myofibroblasts in the skin.** RP105 KO mice and wild-type mice received daily s.c. injections of bleomycin or PBS for two weeks (5 days/week). Mice were sacrificed on day 22, and skin was harvested for analysis. **A.** Immunolabelling. Quantitation showing numbers of F4/80-positive cells /hpf (left panel) and CD3-positive cells /hpf (right panel) from four different areas from each skin section from four mice. One-way ANOVA followed by Sidak's multiple comparison test. **B.** Immunohistochemistry using antibodies to ASMA (left panel). Quantitation of immunohistochemistry images represented as the number of positive cells /hpf from four different areas from each skin section of three mice (right panel). One-way ANOVA followed by Sidak's multiple comparison test. **C.** Immunolabelling using antibodies to Fn-EDA and tenascin-C. Representative images. Bar=100  $\mu\text{m}$ .

**Supplementary Fig. 3: RP105 KO mice showed increased proinflammatory gene expressions.**

RP105 KO and wild-type mice received daily s.c. injections of bleomycin or PBS for two weeks (5 days/week). Mice were sacrificed on day 22, and RNA isolated from skin was subjected to qPCR analysis. Results, normalized with GAPDH, represent the mean  $\pm$  SD of triplicate determinations from four mice. One-way ANOVA followed by Sidak's multiple comparison test.

**Supplementary Fig. 4: Spontaneous skin fibrosis in RP105 KO mice.**

At 6 months of age, female RP105 KO and wild-type mice were sacrificed, and skin tissues were harvested for analysis. **A.** Left panel, H&E stain. Representative images. Bar = 100  $\mu$ m. Right panel, dermal thickness (means  $\pm$  SD of eight determinations/hpf from the indicated number of mice). The black arrow shows dermal thickness. Mann-Whitney *U* test. **B.** Immunolabelling with antibodies to F4/80. **C.** Skin collagen content. Dots represent the means  $\pm$  s.d. from duplicate determination from the indicated number of mice. One-way ANOVA followed by Sidak's multiple comparison test. Bar=100  $\mu$ m.

# Suppl Fig. 1

A

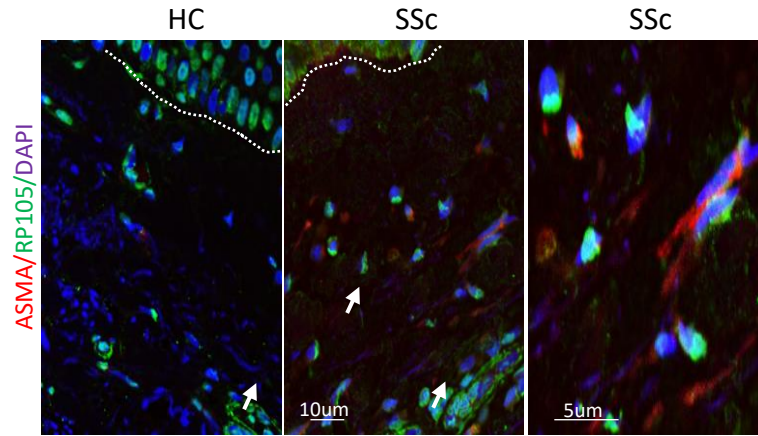

B

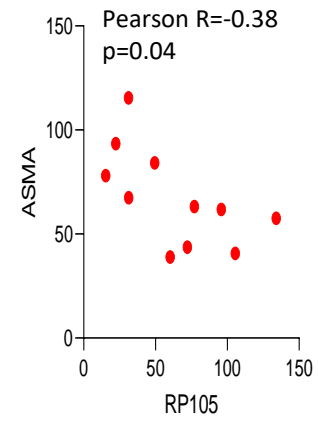

Suppl Fig. 2

A

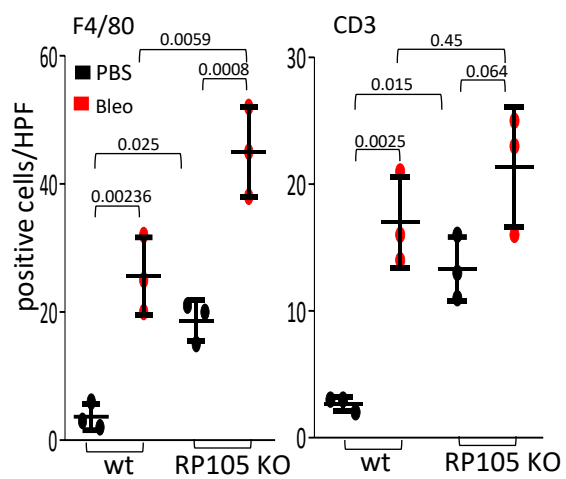

B

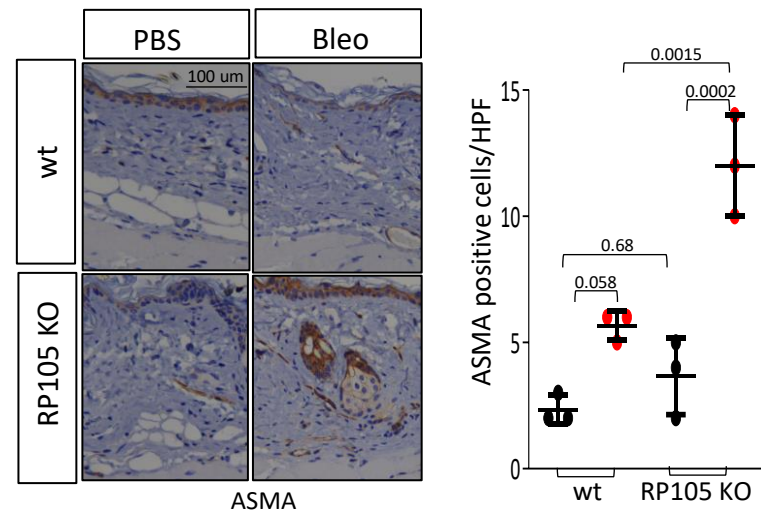

C

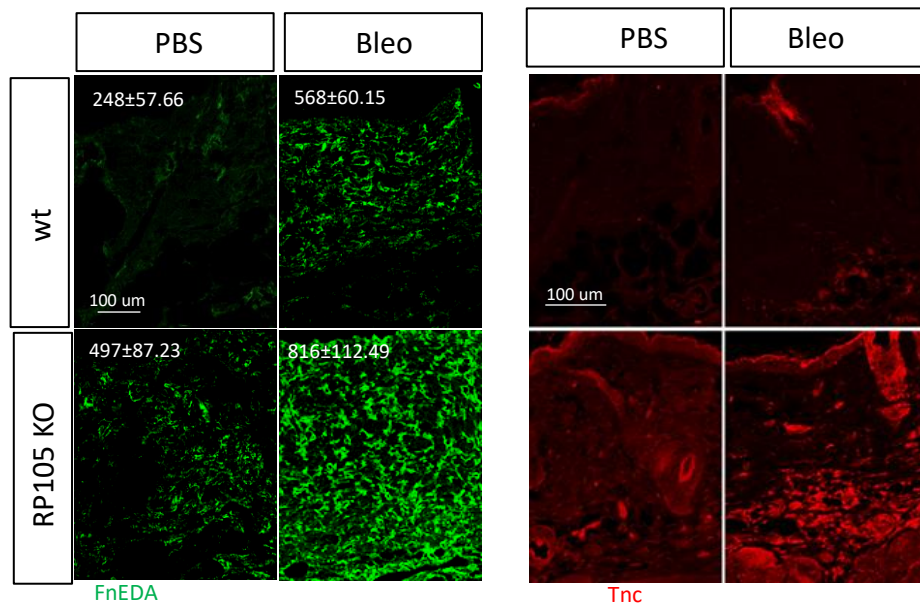

Suppl Fig. 3

Skin mRNA

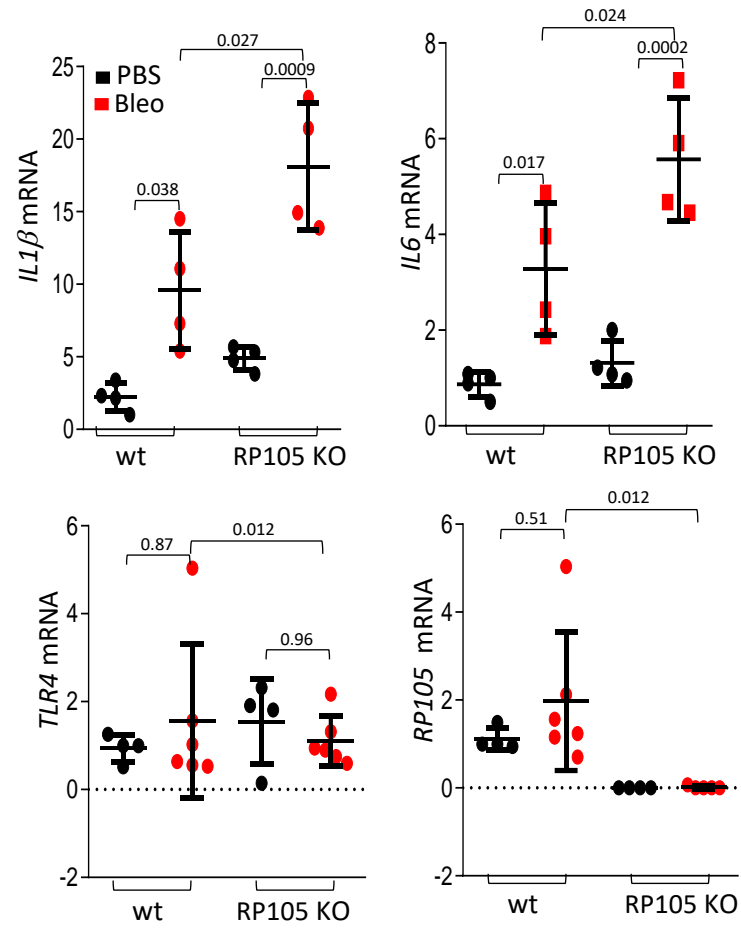

# Suppl. Fig. 4

## A

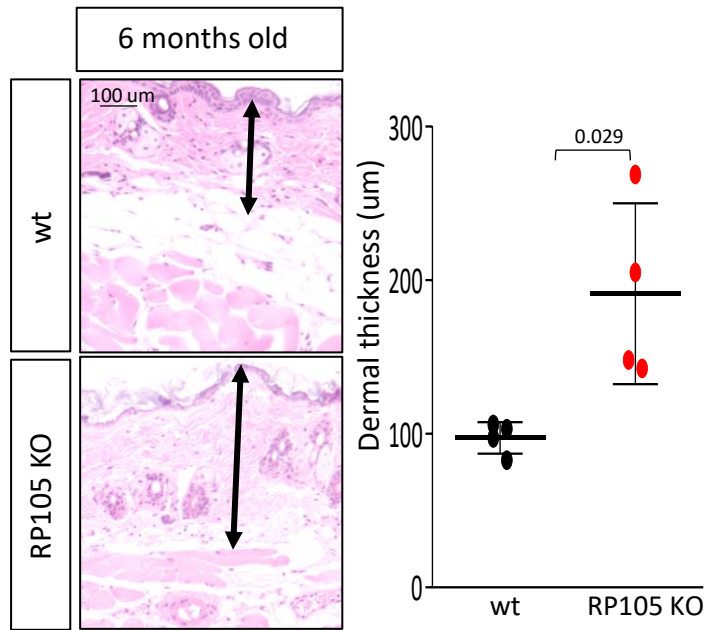

## B

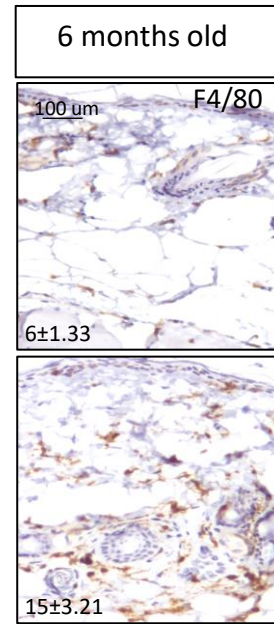

## C

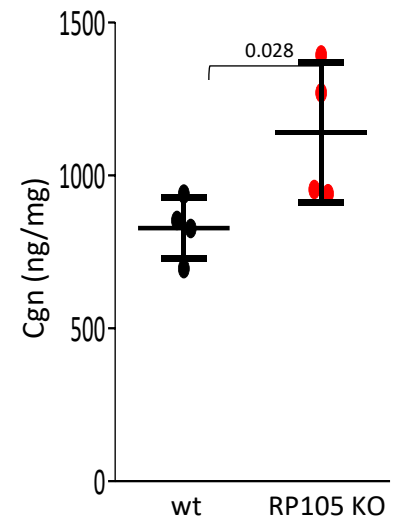

Supplement: sd1 [file 1]
